# Supplementary material for: Lifetime prediction of turbine blades using global precipitation products from satellites
Source: Copernicus journal article supplement (doi:10.5194/wes-2022-59), 2022-07-20
Supplement: Supplementary file [file wes-2022-59-AC4-supplement.pdf]

Wind Energ. Sci. Discuss., community comment CC1  
<https://doi.org/10.5194/wes-2022-59-CC1>, 2022  
© Author(s) 2022. This work is distributed under  
the Creative Commons Attribution 4.0 License.

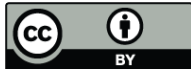

## **Comment on wes-2022-59**

Jackson Tan

---

Community comment on "Lifetime prediction of turbine blades using global precipitation products from satellites" by Merete Badger et al., Wind Energ. Sci. Discuss.,  
<https://doi.org/10.5194/wes-2022-59-CC1>, 2022

---

*Thank you for commenting on our manuscript. Our response is given here below (in italics).*

The time collocation between the in situ data and IMERG (Figure 2) is incorrect. The IMERG precipitation estimate is defined to be representative of the half-hour window with the nominal time indicating the start of the half-hour. For example, the "09:00" file represents the precipitation estimate for the half-hour window of 09:00–09:30. In fact, the filenames of the original half-hour files show both the start and end time. So the way the authors performed the collocation introduces a 15-min offset in the comparison and should be corrected (though I doubt this offset has an appreciable impact on the results).

*Response: We have corrected for the offset between IMERG and in situ data and repeated our analyses with the modified precipitation time series. As expected, the updated results are only slightly different from the initial ones.*
